# Supplementary material for: Colloidal-annealing of ZnO nanoparticles to passivate traps and improve charge extraction in colloidal quantum dot solar cells
Source: Royal Society of Chemistry journal article supplement (doi:10.1039/c9nr06346c), 2019-01-01
Supplement: c9nr06346c1.pdf [file c9nr06346c1.pdf]

Electronic Supplementary Information (ESI)

## **Colloidal annealing of ZnO nanoparticles to passivate traps and improve charge extraction in colloidal quantum dots solar cells**

Ho Kun Woo<sup>#a</sup>, Min Su Kang<sup>#a</sup>, Taesung Park <sup>a</sup>, Junsung Bang <sup>a</sup>, Sanghyun Jeon <sup>a</sup>, Wooseok Lee <sup>a</sup>, Junhyuk Ahn <sup>a</sup>,  
Geonhee Cho <sup>b</sup>, Dong-Kyun Ko<sup>d</sup>, Younghoon Kim <sup>c</sup>, Don-Hyung Ha <sup>b</sup>, and Soong Ju Oh<sup>a\*</sup>

<sup>a</sup>Department of Materials Science and Engineering, Korea University, 02841, Republic of Korea.

Email : [sjoh1982@korea.ac.kr](mailto:sjoh1982@korea.ac.kr)

<sup>b</sup>School of Integrative Engineering, Chung-Ang University, Seoul, 06974, Republic of Korea.

<sup>c</sup>Convergence Research Center for Solar Energy, Daegu Gyeongbuk Institute of Science and Technology (DGIST),  
333 Techno Jungang-Daero, Hyeonpung, Daegu, 42988, Korea.

<sup>d</sup>Department of Electrical and Computer Engineering, New Jersey Institute of Technology, Newark, New Jersey  
07102, United States

**Table S1.** O 1s peak information of ZnO nanoparticles thin films subjected to different annealing treatments

|                     | Oxygen in lattice (at.%) | Oxygen vacancies (at.%) | Absorbed oxygen (at.%) |
|---------------------|--------------------------|-------------------------|------------------------|
| w/o annealing       | 57.9                     | 20.6                    | 21.5                   |
| film-annealing      | 72.6                     | 13.0                    | 14.2                   |
| Colloidal-annealing | 71.2                     | 12.0                    | 16.8                   |

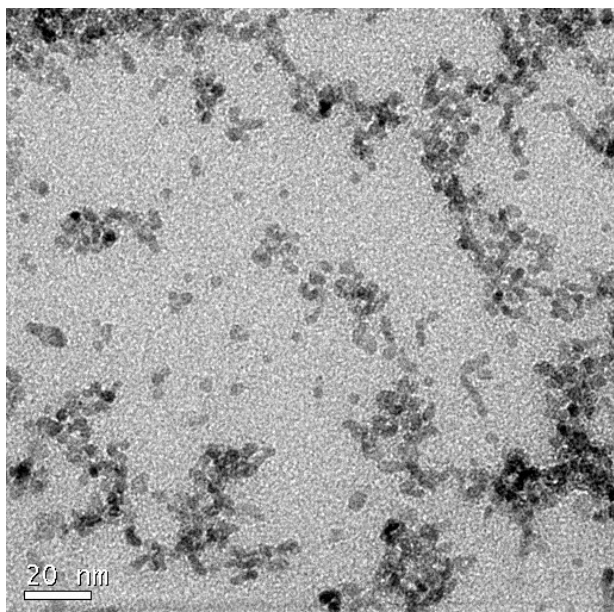

**Fig. S1** Transmission electron microscopy image of as synthesized ZnO nanoparticles

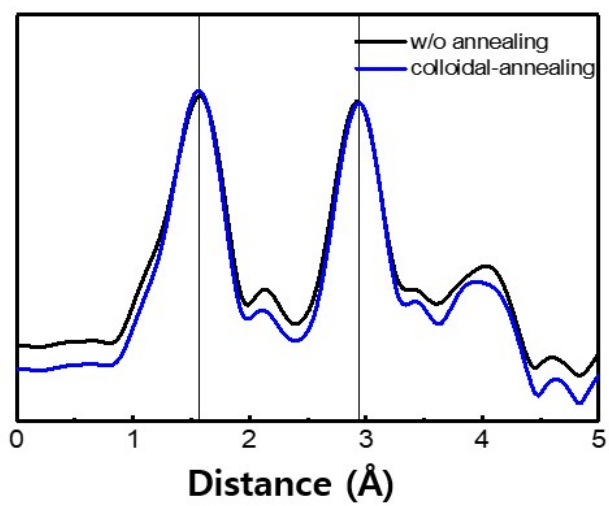

**Fig. S2** Extended X-ray absorption fine structure spectra of ZnO nanoparticle powders without and with colloidal annealing.

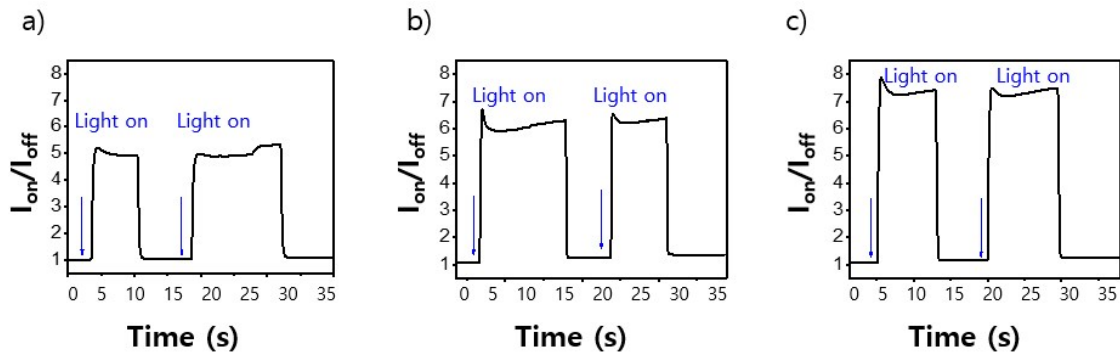

**Fig. S3** Current on and off ratio ( $I_{on}/I_{off}$ ) versus time graph of ZnO NP thin films (a) without annealing, (b) with film-annealing, and (c) with colloidal-annealing under light with wavelength of 254 nm

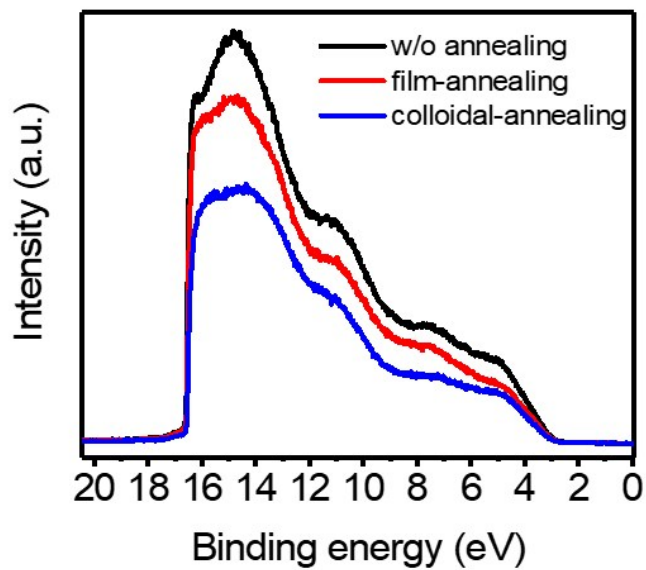

**Fig. S4** Entire ultraviolet photo-emission spectra of ZnO NP thin films obtained using different annealing treatments deposited on Au electrodes.

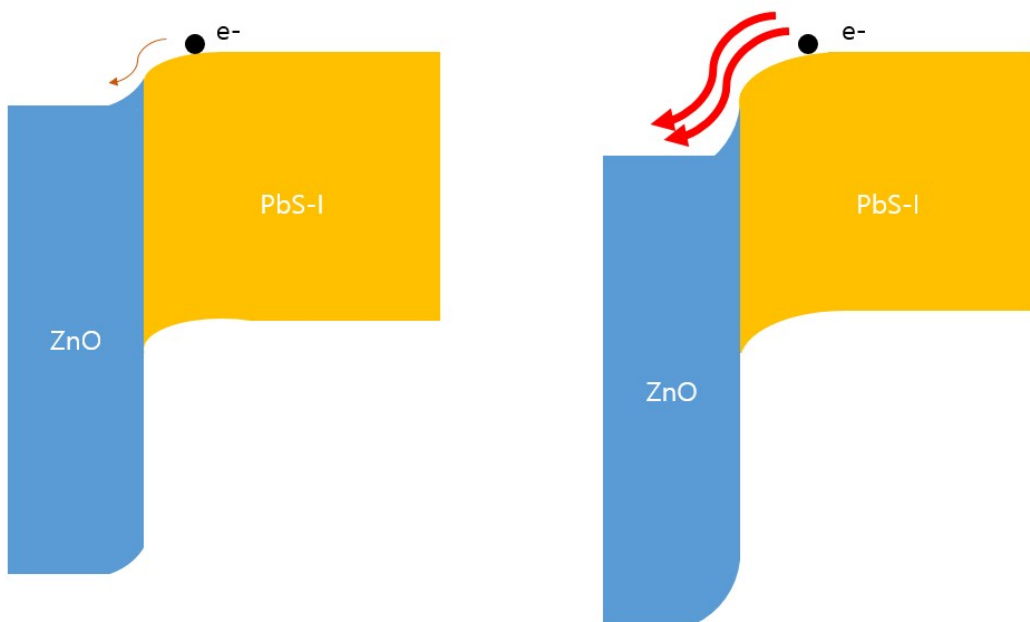

**Fig. S5** Schematic of band structure of a) bare and b) annealed ZnO NPs

a)

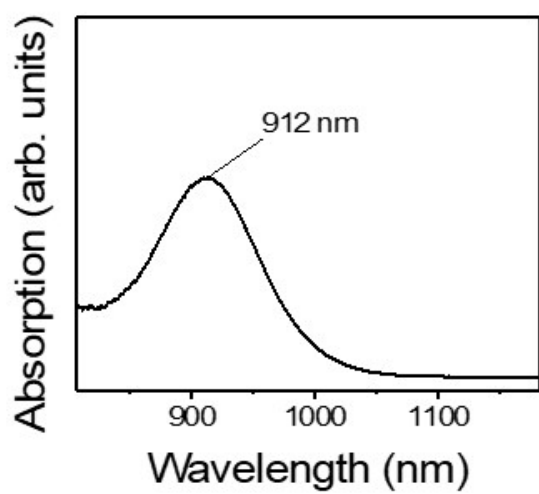

b)

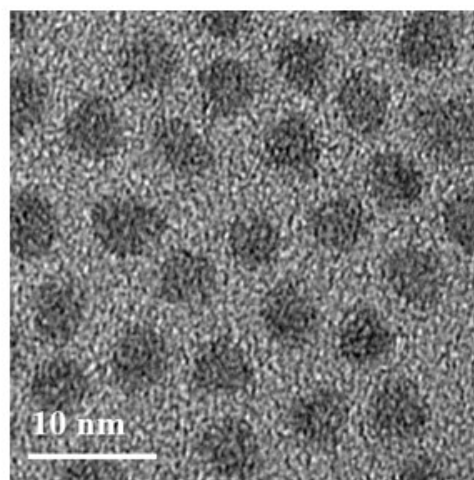

**Fig. S6** a) Ultraviolet-visible spectra and b) transmission electron microscopy image of as-synthesized PbS colloidal quantum dots



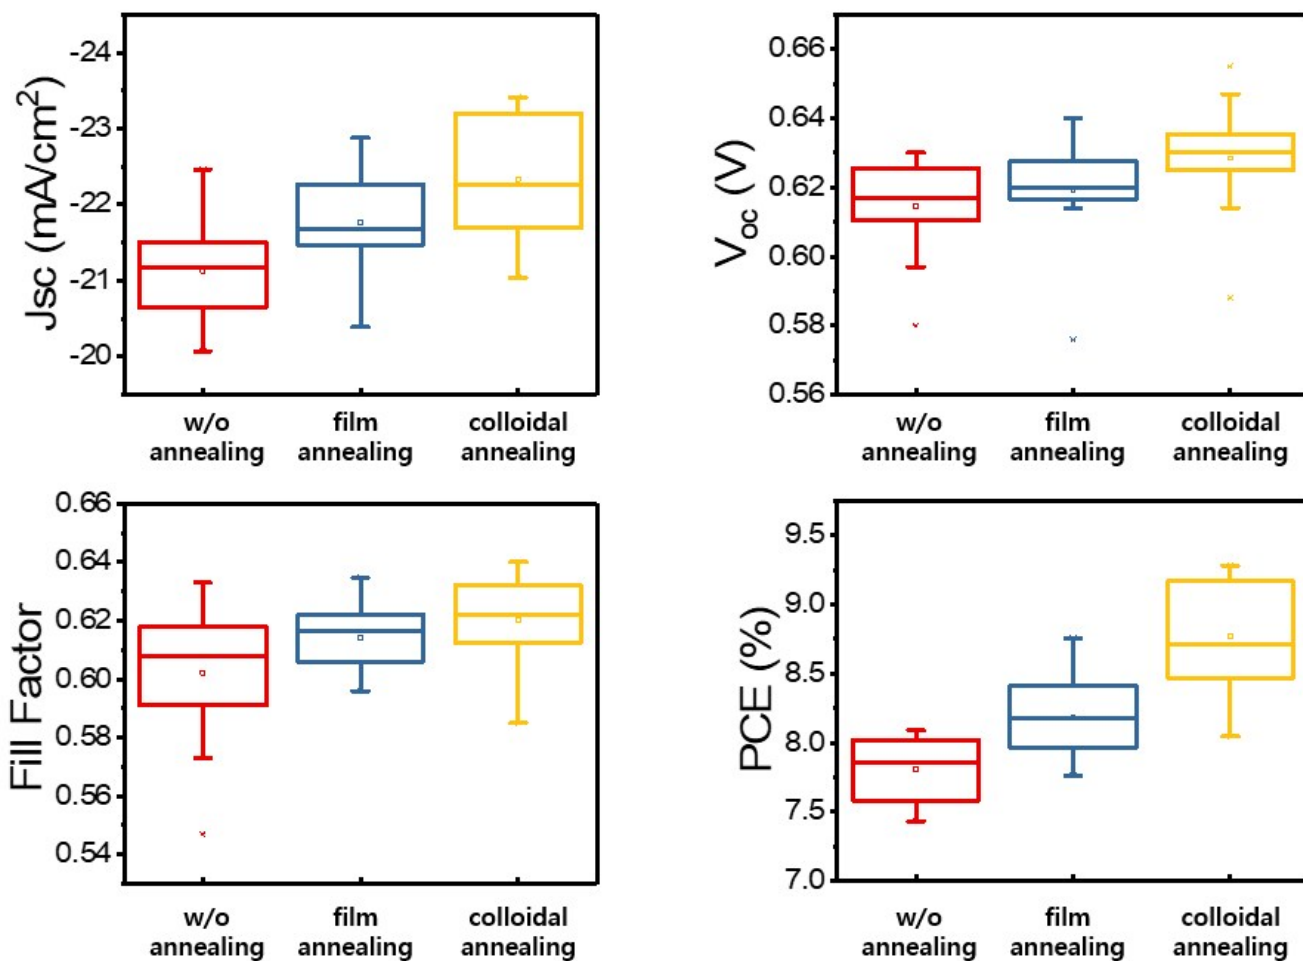

**Fig. S7** Statistical analysis of 20 colloidal quantum dots solar cells using ZnO NP thin films subjected to different annealing conditions ( $J_{sc}$ ,  $V_{oc}$ , FF, and PCE are the short-circuit current density, open circuit voltage, fill factor, and power conversion efficiency, respectively)

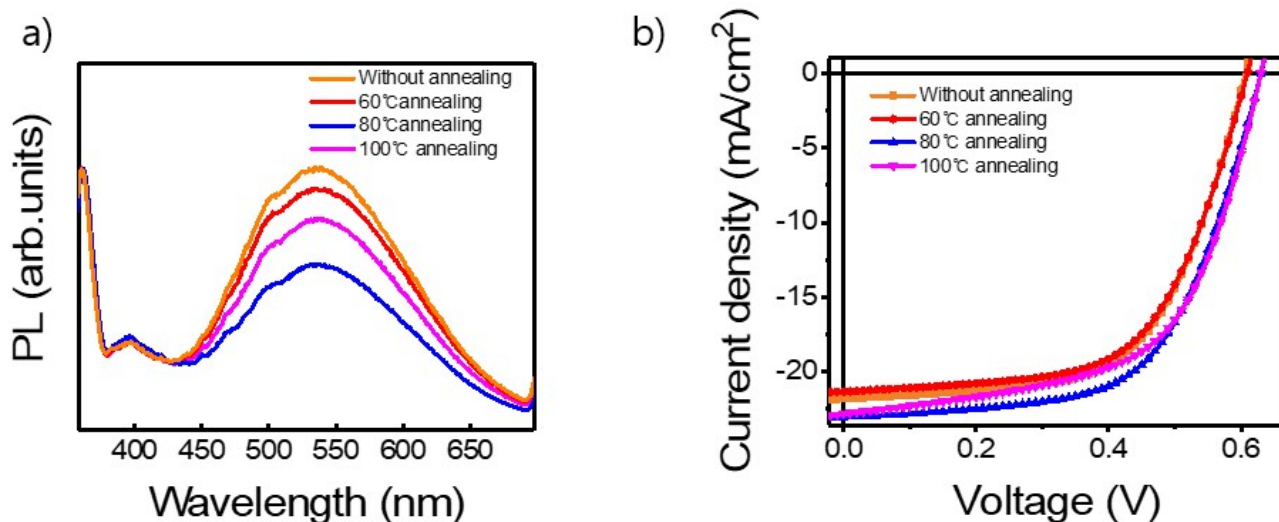

**Fig. S8** Optimization of annealing temperature of ZnO nanoparticle (NP) thin films used for colloidal quantum dots (CQDs) solar cells. (a) Photoluminescence spectra of ZnO NP thin films and (b) Current density–voltage curves of CQD solar cells using ZnO NP thin films subjected to different colloidal annealing temperatures

**Table S2.** Summary of colloidal quantum dots solar cells parameters using subjected to different annealing treatments.

| ETL               | $J_{sc}$ | $V_{oc}$ | FF   | PCE  |
|-------------------|----------|----------|------|------|
| Without annealing | 21.86    | 0.608    | 60.7 | 8.05 |
| 60 °C annealing   | 22.33    | 0.610    | 60.2 | 8.20 |
| 80 °C annealing   | 23.08    | 0.629    | 60.8 | 8.78 |
| 100 °C annealing  | 22.87    | 0.628    | 58.8 | 8.46 |

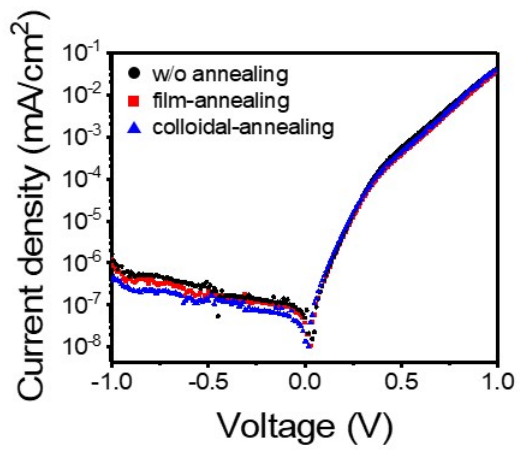

**Fig. S9** Current density–voltage curves of colloidal quantum dots solar cells using ZnO NP thin films subjected to different annealing treatments in the dark

### Calculation of depletion region width<sup>1</sup>

$$W_D(V) = \frac{1}{N_a} \sqrt{\frac{2 \epsilon_r \epsilon_o (V_{bi} - V)}{e \left( \frac{1}{N_a} + \frac{1}{N_b} \right)}} \quad (1)$$

$$\frac{1}{C^2} = \frac{2(V_{bi} - V)}{A^2 e \epsilon_r \epsilon_o N_a} \quad (2)$$

The depletion region width was calculated using Eq. (1), where  $N_a$  is the doping density of PbS-PbI<sub>2</sub>,  $N_b$  is the doping density of the ZnO nanoparticles,  $e$  is the elementary electric charge of the electron,  $V_{bi}$  is the built-in potential of the colloidal quantum dots (CQDs) solar cells, and  $\epsilon_r$  is the PbS-CQDs dielectric constant. The  $V_{bi}$  and doping density values were obtained from the Mott–Schottky plot based on Eq. (2).

### References

1. R. Azmi, S. Y. Nam, S. Sinaga, S. H. Oh, T. K. Ahn, S. C. Yoon, I. H. Jung and S. Y. Jang, *Nano Energy*, 2017, **39**, 355–362.
